# Supplementary material
Source: PubMed Central journal article supplement (PMC10375268)
Supplement: BLOOD_BLD-2023-019631-mmc1.pdf [file BLOOD_BLD-2023-019631-mmc1.pdf]

**Supplemental Table 1.** Comparison of children included vs. excluded in the secondary analysis

| Variable                                 | Patients included (n=592) | Patients excluded (n=150) | P      |
|------------------------------------------|---------------------------|---------------------------|--------|
| <b>Age at diagnosis in years</b>         |                           |                           |        |
| Median (range)                           | 5 (1-19)                  | 6 (1-17)                  | 0.003  |
| <b>Age at study enrollment in years</b>  |                           |                           |        |
| Median (range)                           | 6 (2-21)                  | 8 (2-20)                  | 0.002  |
| <b>Length of follow-up in years</b>      |                           |                           |        |
| Median (range)                           | 7.9 (0.1-13.0)            | 7.6 (0.1-10.6)            | 0.6    |
| <b>Sex, n (%)</b>                        |                           |                           |        |
| Male                                     | 405 (68.4)                | 101 (67.3)                | 0.8    |
| <b>Race/ethnicity, n (%)</b>             |                           |                           |        |
| African-American or Black                | 108 (18.2)                | 28 (18.7)                 | 0.7    |
| Asian                                    | 85 (14.4)                 | 26 (17.3)                 |        |
| Hispanic                                 | 207 (35.0)                | 47 (31.3)                 |        |
| Non-Hispanic White                       | 192 (32.4)                | 49 (32.7)                 |        |
| <b>Parental education, n (%)</b>         |                           |                           |        |
| ≤High school                             | 205 (34.6)                | 50 (33.3)                 | 0.5    |
| <b>Household structure</b>               |                           |                           |        |
| <b>Number of household members</b>       |                           |                           |        |
| Median (range)                           | 4 (2-12)                  | 4 (2-10)                  | 0.5    |
| <b>Total children &lt;18y</b>            |                           |                           |        |
| Median (range)                           | 2 (1-10)                  | 2 (1-8)                   | 0.3    |
| <b>ALL<sup>1</sup> sub-type, n (%)</b>   |                           |                           |        |
| B-lymphoblastic leukemia                 | 521 (88.0)                | 132 (88.0)                | 0.6    |
| T-lymphoblastic leukemia                 | 63 (10.6)                 | 15 (10.0)                 | 0.8    |
| <b>NCI<sup>2</sup> Risk Group, n (%)</b> |                           |                           |        |
| Standard Risk                            | 345 (58.7)                | 77 (52.0)                 | 0.1    |
| <b>Cytogenetics, n (%)</b>               |                           |                           |        |
| Favorable                                | 227 (38.3)                | 66 (44.0)                 | 0.1    |
| Neutral                                  | 298 (50.3)                | 64 (42.7)                 |        |
| Unfavorable                              | 30 (5.1)                  | 12 (0.8)                  |        |
| <b>6MP dose intensity<sup>3</sup></b>    |                           |                           |        |
| Median (range)                           | 0.88 (0.03-2.97)          | 0.73 (0.06-2.05)          | <0.001 |
| <b>Methotrexate dose intensity</b>       |                           |                           |        |
| Median (range)                           | 0.88 (0.2-2.74)           | 0.78 (0.1-1.41)           | <0.001 |

Reasons for exclusion included: residence outside the US, did not report annual income or *TPMT* deficiency/ *NUDT15* mutants

<sup>1</sup>ALL denotes acute lymphoblastic leukemia; <sup>2</sup>NCI denotes National Cancer Institute; <sup>3</sup>6MP denotes 6-mercaptopurine. Favorable cytogenetics included t(12;21); hyperdiploidy; trisomy 4 and 10; or trisomy 4, 10, and 17. Unfavorable cytogenetics included t(9;22), t(4;11), hypodiploidy, or extreme hypodiploidy. Neutral cytogenetics implied absence of favorable or unfavorable cytogenetics.



**Supplemental Table 2.** Sociodemographic and disease characteristics of patients with ALL in MEMS sub-cohort, overall and by poverty group

| Variable                                 | Entire cohort (n=389) | Not in extreme poverty (n=347) | In Extreme Poverty (n=42) | P      |
|------------------------------------------|-----------------------|--------------------------------|---------------------------|--------|
| <b>Age at diagnosis in years</b>         |                       |                                |                           |        |
| Median (range)                           | 4 (1-19)              | 4 (1-19)                       | 4 (2-18)                  | 0.7    |
| <b>Age at study enrollment in years</b>  |                       |                                |                           |        |
| Median (range)                           | 6 (2,20)              | 6 (2,20)                       | 6 (3,20)                  | 0.8    |
| <b>Length of follow-up in years</b>      |                       |                                |                           |        |
| Median (range)                           | 7.9 (0.2-10.6)        | 7.9 (0.2-10.1)                 | 7.9 (0.4-10.6)            | 0.4    |
| <b>Sex, n (%)</b>                        |                       |                                |                           |        |
| Male                                     | 260 (66.8)            | 234 (67.4)                     | 26 (61.9)                 | 0.4    |
| <b>Race/ethnicity, n (%)</b>             |                       |                                |                           |        |
| African-American or Black                | 60 (15.4)             | 53 (15.3)                      | 7 (16.7)                  | <0.001 |
| Asian                                    | 56 (14.4)             | 53 (15.3)                      | 3 (7.1)                   |        |
| Hispanic                                 | 148 (38.1)            | 117 (33.7)                     | 31 (73.8)                 |        |
| Non-Hispanic white                       | 125 (32.1)            | 124 (35.7)                     | 1 (2.4)                   |        |
| <b>Parental education, n (%)</b>         |                       |                                |                           |        |
| ≤High school                             | 128 (33.0)            | 101 (29.1)                     | 27 (65.9)                 | <0.001 |
| <b>Household structure</b>               |                       |                                |                           |        |
| <b>Number of household members</b>       |                       |                                |                           |        |
| median (range)                           | 4 (2-12)              | 4 (2-11)                       | 6 (4-12)                  | <0.001 |
| <b>Number of children &lt;18y</b>        |                       |                                |                           |        |
| median (range)                           | 2 (1-9)               | 2 (1-9)                        | 3 (1-6)                   | 0.0003 |
| <b>ALL<sup>1</sup> sub-type, n (%)</b>   |                       |                                |                           |        |
| B-lymphoblastic leukemia                 | 347 (89.2)            | 306 (88.2)                     | 41 (97.6)                 | 0.06   |
| T-lymphoblastic leukemia                 | 39 (10.0)             | 38 (11.0)                      | 1 (2.4)                   | 0.08   |
| <b>NCI<sup>2</sup> Risk Group, n (%)</b> |                       |                                |                           |        |
| Standard Risk                            | 233 (60.1)            | 206 (59.5)                     | 27 (64.3)                 | 0.6    |
| <b>Cytogenetics, n (%)</b>               |                       |                                |                           |        |
| Favorable                                | 156 (40.1)            | 136 (39.2)                     | 20 (47.6)                 | 0.2    |
| Neutral                                  | 194 (49.8)            | 179 (51.6)                     | 15 (35.7)                 |        |
| Unfavorable                              | 18 (4.6)              | 15 (4.3)                       | 3 (7.1)                   |        |
| <b>6MP dose intensity<sup>3</sup></b>    |                       |                                |                           |        |
| Median (range)                           | 0.88 (0.24-2.97)      | 0.88 (0.24-2.97)               | 0.88 (0.41-1.53)          | 0.3    |
| <b>Methotrexate dose intensity</b>       |                       |                                |                           |        |
| Median (range)                           | 0.89 (0.2-2.74)       | 0.89 (0.2-2.74)                | 0.87 (0.26-1.46)          | 0.7    |

<sup>1</sup>ALL denotes acute lymphoblastic leukemia; <sup>2</sup>NCI denotes National Cancer Institute; <sup>3</sup>6MP denotes 6-mercaptopurine. Favorable cytogenetics included t(12;21); hyperdiploidy; trisomy 4 and 10; or trisomy 4, 10, and 17. Unfavorable cytogenetics included t(9;22), t(4;11), hypodiploidy, or extreme hypodiploidy. Neutral cytogenetics implied absence of favorable or unfavorable cytogenetics.

**Supplemental Table 3.** Comparison of children who participated in MEMS sub-cohort vs those that did not

| Variable                                 | MEMS <sup>1</sup> participants (n=389) | MEMS non-participants (n=203) | P    |
|------------------------------------------|----------------------------------------|-------------------------------|------|
| <b>Age at diagnosis in years</b>         |                                        |                               |      |
| Median (range)                           | 4 (1-19)                               | 5 (1-19)                      | 0.9  |
| <b>Age at study enrollment in years</b>  |                                        |                               |      |
| Median (range)                           | 6 (2-20)                               | 6 (2-21)                      | 0.2  |
| <b>Length of follow-up in years</b>      |                                        |                               |      |
| Median (range)                           | 7.9 (0.2-10.6)                         | 7.7 (0.1-13.0)                | 0.1  |
| <b>Sex, n (%)</b>                        |                                        |                               |      |
| Male                                     | 260 (66.8)                             | 145 (71.4)                    | 0.3  |
| <b>Race/ethnicity, n (%)</b>             |                                        |                               |      |
| African-American or Black                | 60 (15.4)                              | 48 (23.7)                     | 0.04 |
| Asian                                    | 56 (14.4)                              | 29 (14.3)                     |      |
| Hispanic                                 | 148 (38.1)                             | 59 (29.1)                     |      |
| Non-Hispanic White                       | 125 (32.1)                             | 67 (33.0)                     |      |
| <b>Parental education, n (%)</b>         |                                        |                               |      |
| ≤High school                             | 128 (33.0)                             | 77 (38.1)                     | 0.2  |
| <b>Household structure</b>               |                                        |                               |      |
| <i>Number of household members</i>       |                                        |                               |      |
| Median (range)                           | 4 (2-12)                               | 5 (2-12)                      | 0.8  |
| <i>Total children &lt;18y</i>            |                                        |                               |      |
| Median (range)                           | 2 (1-9)                                | 2 (1-10)                      | 0.4  |
| <b>ALL<sup>2</sup> sub-type, n (%)</b>   |                                        |                               |      |
| B-lymphoblastic leukemia                 | 347 (89.2)                             | 174 (87.0)                    | 0.4  |
| T-lymphoblastic leukemia                 | 39 (10.0)                              | 24 (12.0)                     | 0.5  |
| <b>NCI<sup>3</sup> Risk Group, n (%)</b> |                                        |                               |      |
| Standard Risk                            | 233 (60.1)                             | 112 (56.0)                    | 0.3  |
| <b>Cytogenetics, n (%)</b>               |                                        |                               |      |
| Favorable                                | 156 (40.1)                             | 71 (35.0)                     | 0.4  |
| Neutral                                  | 194 (49.9)                             | 104 (51.2)                    |      |
| Unfavorable                              | 18 (4.6)                               | 12 (5.9)                      |      |
| <b>6MP dose intensity<sup>4</sup></b>    |                                        |                               |      |
| Median (range)                           | 0.88 (0.24-2.97)                       | 0.88 (0.03-2.13)              | 0.7  |
| <b>Methotrexate dose intensity</b>       |                                        |                               |      |
| Median (range)                           | 0.89 (0.2-2.74)                        | 0.88 (0.2-2.03)               | 0.4  |

<sup>1</sup>MEMS denotes medication event monitoring systems; <sup>2</sup>ALL denotes acute lymphoblastic leukemia; <sup>3</sup>NCI denotes National Cancer Institute; <sup>4</sup>6MP denotes 6-mercaptopurine. Favorable cytogenetics included t(12;21); hyperdiploidy; trisomy 4 and 10; or trisomy 4, 10, and 17. Unfavorable cytogenetics included t(9;22), t(4;11), hypodiploidy, or extreme hypodiploidy. Neutral cytogenetics implied absence of favorable or unfavorable cytogenetics.

**Supplementary Figure 1. Study Schema for AALL03N1**

Used with permission from report by Landier et al, Blood. 2017;129(14):1919-1926

|                           | ← 6 months → |        |        |          |            |            |            |
|---------------------------|--------------|--------|--------|----------|------------|------------|------------|
|                           | Day 1        | Day 29 | Day 57 | Day 85/1 | Day 113/29 | Day 141/57 | Day 169/85 |
| Assent / consent          | X            |        |        |          |            |            |            |
| Demographic questionnaire |              | X      |        |          |            |            |            |
| Self-report of 6MP intake |              | X      | X      |          | X          | X          |            |
| MEMS monitoring of 6MP    | →            |        |        |          |            |            |            |
| MEMS data download        |              |        |        |          |            |            | X          |
| <i>TPMT</i> genotype      | X            |        |        |          |            |            |            |
| Red cell TGN levels       |              | X      | X      | X        | X          | X          | X          |

Abbreviations: 6MP, 6-mercaptopurine; MEMS, Medication Event Monitoring System; *TPMT*, thiopurine methyltransferase; TGN, erythrocyte thioguanine nucleotide concentrations
